# Supplementary material
Source: publisher site journal article supplement (https://www.dovepress.com/article/334668)
Supplement: Supplementary file 1 [file get_supplementary_file.php]

**Supplementary Material 1**

**QUESTIONNAIRE: Survey of knowledge of atorvastatin**

**-------------------------------------------------------------------------------------------------------------------**

**Explanation:** Please tick a box (✓) or answer the following questions about you. All responses in the survey will be kept strictly confidential and will not affect your normal treatment.

**Part 1 Baseline Information**

**Explanation:** Please tick a box (✓) or answer the following questions about you.

1. Sex ❒ Male ❒Female
2. Age …………………… years old
3. Education

❒ Primary school ❒ Bachelor’s degree

❒ Secondary school ❒ Master’s degree

❒ Senior high school ❒ Doctor’s degree

❒ Diploma ❒ Etc. (please specify) …………

1. Occupation

❒ Unemployed ❒ Student/Academic

❒ Agriculturist ❒ Private corporation

❒ Self-employed business ❒ Government officer

❒ Work as employee ❒ State enterprise

❒ etc. (please specify) ………………………………

1. What is your health insurance?

❒ The Universal Coverage ❒ Social security

❒ The Civil Servant Medical Benefits Scheme ❒ Self-pay

❒ Etc. (please specify) ………………………………

1. Do you have underlying disease?

❒ No

❒ Yes (please specify) ………………………………….………………………………………

1. A history of drinking

❒ Never

❒ Yes, but I quit drinking…………… months ago

❒ I’m still drinking about ………………glasses/week

1. A history of smoking

❒ Never

❒ Yes, but I quit smoking…………… months ago

❒ I’m still smoking about ………………roll/day

1. Do you take vitamin supplements and herbal medicine? (except the products prescribed from the hospital)

❒ No

❒ Yes (please specify) ……………………………………………………………

1. What symptoms or diseases did you come to the doctor today?....................................................
2. How many medicines are you currently using?.....................................................................................

Please specify a name of medicines.......................................................................................................

1. How long have you been use the medicines?.........................................................................................
2. Have you ever experienced adverse reactions from medications?

 Never

 Have been allergic to medications (identifying symptoms and medications) .......................................................................................................................................................

 Have been side effects from medications (identifying symptoms and medications) .......................................................................................................................................................

Part 1 Knowledge of your medicine

For the following questions: "**this medicine**" means the atorvastatin that you are using at this time.

**Explanation:** Please tick a box (✓) or answer the following questions about you. All responses in the survey will be kept strictly confidential and will not affect your normal treatment.

1. What is generic name of this medicine?

🞏 Atorvastatin 🞏 Simvastatin

🞏 Paracetamol 🞏 Dimenhydrinate

1. What is indication of this medicine?

🞏 Decrease blood cholesterol. 🞏 Decrease blood glucose.

🞏 Decrease blood uric acid. 🞏 Relieve pain and inflammation

1. What is contraindication of this medicine?

🞏 Hepatic disease 🞏 Renal disease

🞏 Gastric ulcer 🞏 Migraine

1. Can pregnant and breastfeeding women take this medicine?

🞏 Yes 🞏 No

🞏 Depend on the trimester 🞏 Have no the information

1. How should you take this medicine?

🞏 Take it at the same time every day.

🞏 You can adjust your medicine.

🞏 Take this medication only when have symptoms.

🞏 This medicine must be taken immediately after meals.

1. What should you do if you miss a dose?

🞏 Do not take this medicine until the next visit.

🞏 Take as soon as you remember, or with a next dose.

🞏 Compensate twice as much in the next meal.

🞏 Do not take because take only when you have symptoms.

1. What symptoms should stop you taking the medicine and go to doctor?

🞏 Diarrhea, Indigestion

🞏 Scurvy blood spitting

🞏 Irregular color vision

🞏 Muscle pain and fever with unknown cause

1. How should you keep this medicine?

🞏 Keep this medicine in the refrigerator.

🞏 Keep this medicine under 30°C

🞏 Keep this medicine for 1 month.

🞏 Always carry this medicine for use when have symptoms.

1. What organ should be checked after receiving this medicine for 6 and 12 weeks and every 6 months?

🞏 Liver

🞏 Kidney

🞏 Stomach

🞏 Eye

1. How does this medicine affect sugar levels?

🞏 An increase blood sugar.

🞏 A decrease blood sugar.

🞏 It does not affect blood sugar levels.

🞏 No information.

**“Thank you for answering this questionnaire”**

Part 2 Survey of behaviors and attitudes towards reading the patient information leaflet (PIL)

**Explanation:** Please tick a box (✓) or answer the following questions about you. All responses in the survey will be kept strictly confidential and will not affect your normal treatment.

1. Have you read the patient information leaflet attached to this medicine?

🞏 Do not read 🞏 Read all parts

🞏 Read only the part that I am interested, please specify (can select more than 1 item)

| ⭘ What is this medicine?  ⭘ Indication of the medicine  ⭘ Contraindication  ⭘ Special precautions  ⭘ Drug interaction  ⭘ Pregnant/Breastfeeding women | ⭘ Administration  ⭘ What to do if miss a dose  ⭘ Overdose management  ⭘ Adverse drug reactions  ⭘ Storage  ⭘ Warning according to the Ministry of Public Health announcement. |
| --- | --- |

1. If you do not read PIL, please state the reason. (can select more than 1 item)

| 🞏 received information from the doctor.  🞏 received information from the pharmacist.  🞏 content is too long.  🞏 I'll be worried.  🞏 it's confusing.  🞏 have experience with medicine | 🞏 Too many terminology  🞏 the font size is too small.  🞏 information is not important.  🞏 content is hard to understand.  🞏 the data is useless.  🞏 Other, please specify.............. |
| --- | --- |

1. When the first time that you read this PIL?

| 🞏 since receiving  🞏 When I have abnormal symptoms. | 🞏 When in doubt/curious about this medicine  🞏 Other (please specify)......................... |
| --- | --- |

1. During the past 1 month How many times have you read this PIL? .................. ครั้ง
2. What the level of usefulness of this PIL?

(Please mark 🗶 on the line below with a score level from 0 to 10)

**Useless**

**Most useful**

0

10

1. What level of worry do you feel after reading the PIL?

(Please mark 🗶 on the line below with a score level from 0 to 10)

**Not worried**

**Most worried**

0

10

1. If you don’t understand about the information in this PIL, what are your additional sources of information? (can select more than 1 item)

| 🞏 Internet  🞏 Book/ Journal of medicine  🞏 physician | 🞏 Asking a friend/parent  🞏 pharmacist  🞏 etc........................ |
| --- | --- |

1. Do you agree to give the PIL to all patient who use this medicine?

🞏 Disagree

🞏 Agree ⭘ Give the PIL to patient every visit

⭘ Give the PIL to patient only first time use this medicine

⭘ Give the PIL to patient who have risk

⭘ Give the PIL only for patient who want

1. As you answer Part 1 questions, Do you use the PIL to complete the questionnaire?

🞏 Yes

🞏 No, but I read PIL before and I can remember the information

🞏 No and I have never read the PIL

1. Date that you complete this questionnaire ..........................................................

**“Thank you for answering this questionnaire”**
